# Supplementary material for: Reversible phase transition and thermochromic response in hybrid copper-based perovskites
Source: Royal Society of Chemistry journal article supplement (doi:10.1039/d3tc01087b), 2023-01-01
Supplement: d3tc01087b1.pdf [file d3tc01087b1.pdf]

## **Reversible phase transition and thermochromic response in two-dimensional organic copper-based perovskites**

Gele Teri, Qiang-Qiang Jia, Qing-Feng Luo, Hao-Fei Ni, Da-Wei Fu\* and Qiang Guo\*

Institute for Science and Applications of Molecular Ferroelectrics, Key Laboratory of the Ministry of Education for Advanced

Catalysis Materials, Zhejiang Normal University, Jinhua, 321004, People's Republic of China

E-mail: dawei@zjnu.edu.cn; qianguo@zjnu.edu.cn

## Experimental Section

### Synthetic procedures

All reagents and solvents employed in this work are readily commercially available without further purification. 4-methoxybenzylamine (98%, Meryer-Shanghai), benzylamine (99%, Aladdin), cupric chloride anhydrous ( $\text{CuCl}_2$ , 98%, Adama-Sahngai), methanol ( $\text{CH}_3\text{OH}$ , AR, HUSHI-Shanghai) and hydrochloric acid ( $\text{HCl}$ , AR, HUSHI-Shanghai).

For  $(\text{MBA})_2\text{CuCl}_4$  (**1**) crystals,  $\text{CuCl}_2$  and 4-methoxybenzylamine were mixed in a solution of methanol and  $\text{HCl}$  at a molar ratio of 2:1. Dark yellow flaky single crystals were obtained by slow evaporation at room temperature.

For  $(\text{BA})_2\text{CuCl}_4$  (**2**) crystals,  $\text{CuCl}_2$  and benzylamine were mixed in the  $\text{HCl}$  solution at a molar ratio of 2:1. Dark yellow flaky single crystals were obtained by slow evaporation at room temperature.

**X-ray single crystal diffraction.** Single-crystal X-ray diffraction data were collected by using a Bruker D8 APEX-III diffractometer with  $\text{Mo-K}\alpha$  and  $\text{Cu-K}\alpha$  radiation (operating at 50 kV and 40 mA). Data reduction and numerical absorption corrections were generated using APEX-III software. Refinement of single crystal data was solved and refined using SHELXT and OLEX 2 software packages, all non-hydrogen atoms were anisotropically manipulated.

**Thermal stability.** The powders of the two compounds were put in aluminum crucibles and then placed in the differential scanning calorimetry (DSC) instrument for the experiment. The experiment was conducted with heating and cooling rates of  $20 \text{ K}\cdot\text{min}^{-1}$ .

**Dielectric measurements.** The powder was pressed into a sheet, and the dielectric measurement was performed on the Tonghui TH2828A instrument at various temperatures. The frequency range was from 500 Hz to 1 MHz.

**Powder X-ray diffraction.** Powder X-ray diffraction (PXRD) data for two compounds were measured on a D8 Advance 03030502 instrument at room temperature. Diffraction patterns were collected in the  $2\theta$  range of  $5\sim 55^\circ$  with a step size of  $0.02^\circ$ .

**UV-Vis Measurements.** UV-near-infrared-visible (UV-NIR-vis) spectra were obtained on a Cary RF 6000 instrument.

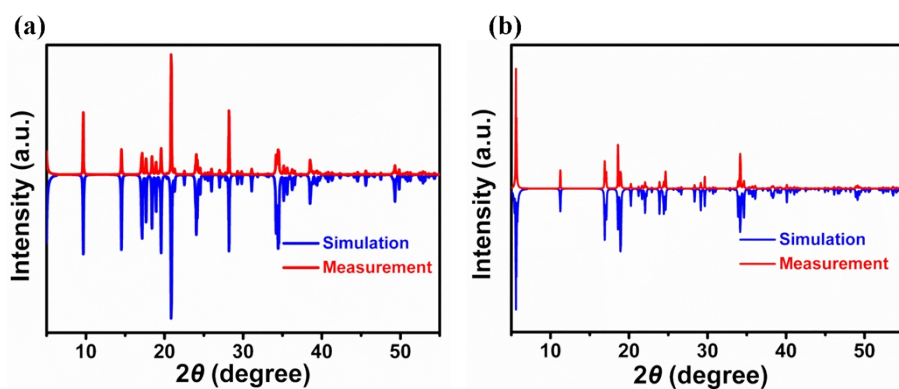

Figure S1. Powder X-ray diffraction (PXRD) patterns for (MBA)<sub>2</sub>CuCl<sub>4</sub> (1) and (BA)<sub>2</sub>CuCl<sub>4</sub> (2).

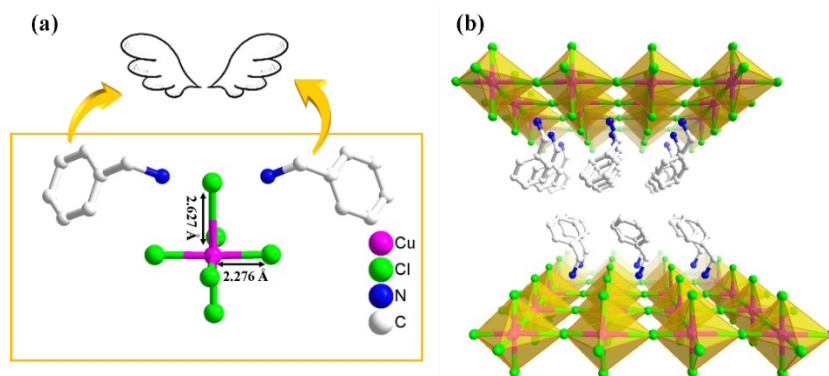

Figure S2. (a and b) Crystal structures of (BA)<sub>2</sub>CuCl<sub>4</sub> (2). For clarity, all H atoms were omitted.

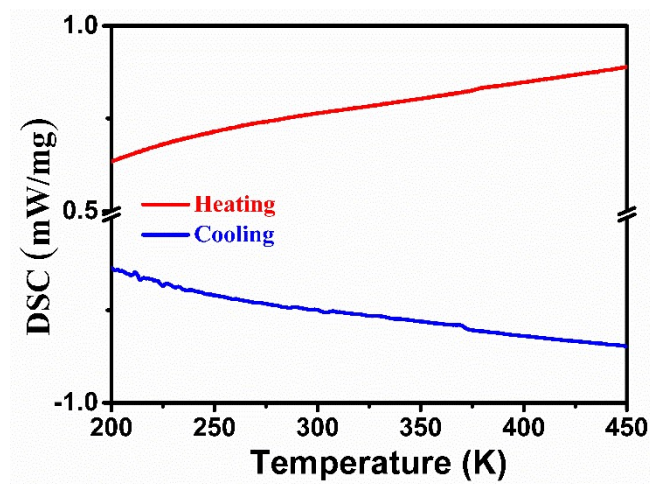

Figure S3. DSC curve of (BA)<sub>2</sub>CuCl<sub>4</sub> (2) in heating-cooling runs.

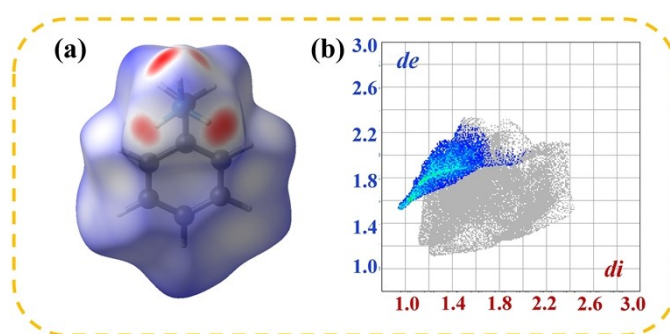

**Figure S4.** Hirshfeld surface (a) and 2D fingerprint plot (b) for (BA)<sub>2</sub>CuCl<sub>4</sub> (2).

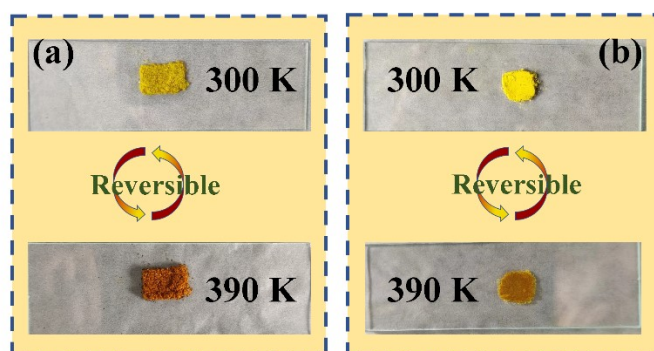

**Figure S5.** Color changes of (a) (MBA)<sub>2</sub>CuCl<sub>4</sub> (1) and (b) (BA)<sub>2</sub>CuCl<sub>4</sub> (2).

**Table S1** Cell parameters for compound **1** at different temperatures.

| Temp | 273K   | 293K   | 313K   | 333K   | 353K   | 373K   | 393K   | 413K   | 432K   |
|------|--------|--------|--------|--------|--------|--------|--------|--------|--------|
| a(Å) | 10.504 | 10.539 | 10.543 | 10.559 | 10.579 | 10.601 | 10.636 | 10.672 | 10.693 |
| b(Å) | 36.811 | 36.831 | 36.884 | 36.918 | 36.971 | 36.996 | 37.088 | 37.206 | 37.267 |
| c(Å) | 5.2766 | 5.2795 | 5.2844 | 5.2855 | 5.2935 | 5.2939 | 5.3083 | 5.316  | 5.3299 |

**Table S2** Crystallographic data and structural refinement details of compound **1**

| Compounds                    | (MBA) <sub>2</sub> CuCl <sub>4</sub>                                            |                                                                                  |
|------------------------------|---------------------------------------------------------------------------------|----------------------------------------------------------------------------------|
|                              | LTP                                                                             | HTP                                                                              |
| CCDC Code                    | 2219275                                                                         | 2219276                                                                          |
| Formula                      | C <sub>16</sub> H <sub>24</sub> Cl <sub>4</sub> CuN <sub>2</sub> O <sub>2</sub> | C <sub>16</sub> H <sub>24</sub> Cl <sub>4</sub> N <sub>2</sub> O <sub>2</sub> Cu |
| Fw                           | 481.71                                                                          | 481.71                                                                           |
| Temp(K)                      | 273                                                                             | 432                                                                              |
| Crystal Syst                 | Orthorhombic                                                                    | Orthorhombic                                                                     |
| Space group                  | <i>Pnma</i>                                                                     | <i>Pnma</i>                                                                      |
| <i>a</i> (Å)                 | 10.504(3)                                                                       | 10.693(4)                                                                        |
| <i>b</i> (Å)                 | 36.811(14)                                                                      | 37.267(11)                                                                       |
| <i>c</i> (Å)                 | 5.2766(9)                                                                       | 5.3299(14)                                                                       |
| $\alpha$ /°                  | 90                                                                              | 90                                                                               |
| $\beta$ /°                   | 90                                                                              | 90                                                                               |
| $\gamma$ /°                  | 90                                                                              | 90                                                                               |
| V(Å <sup>3</sup> )           | 2040.3(11)                                                                      | 2123.9(12)                                                                       |
| Z                            | 4                                                                               | 4                                                                                |
| $\mu$ (mm <sup>-1</sup> )    | 6.438                                                                           | 1.543                                                                            |
| GOF on <i>F</i> <sup>2</sup> | 1.077                                                                           | 1.060                                                                            |
| <i>R</i> <sub>1</sub>        | 0.0670                                                                          | 0.0516                                                                           |
| <i>wR</i> <sub>2</sub>       | 0.1635                                                                          | 0.1400                                                                           |

**Table S3** Crystallographic data and structural refinement details of compound **2**

| Compound                     | (BA) <sub>2</sub> CuCl <sub>4</sub>                               |
|------------------------------|-------------------------------------------------------------------|
| CCDC Code                    | 2219277                                                           |
| Formula                      | C <sub>14</sub> H <sub>20</sub> Cl <sub>4</sub> N <sub>2</sub> Cu |
| Fw                           | 421.66                                                            |
| Temp(K)                      | 300                                                               |
| Crystal Syst                 | Monoclinic                                                        |
| Space group                  | <i>Cc</i>                                                         |
| <i>a</i> (Å)                 | 31.706(5)                                                         |
| <i>b</i> (Å)                 | 5.2429(7)                                                         |
| <i>c</i> (Å)                 | 10.5574(15)                                                       |
| <i>α</i> <sup>°</sup>        | 90                                                                |
| <i>β</i> <sup>°</sup>        | 98.116(6)                                                         |
| <i>γ</i> <sup>°</sup>        | 90                                                                |
| V(Å <sup>3</sup> )           | 1737.4(4)                                                         |
| Z                            | 4                                                                 |
| <i>μ</i> (mm <sup>-1</sup> ) | 1.866                                                             |
| GOF on <i>F</i> <sup>2</sup> | 1.062                                                             |
| <i>R</i> <sub>1</sub>        | 0.0369                                                            |
| <i>wR</i> <sub>2</sub>       | 0.0865                                                            |

**Table S4** Selected bond lengths /Å and angles/° for compound **1**

| Compound 1                             |            |                                         |            |
|----------------------------------------|------------|-----------------------------------------|------------|
|                                        | LTP        |                                         | HTP        |
| Cu1-Cl1                                | 2.276(2)   | Cu1-Cl0A <sup>1</sup>                   | 2.294(4)   |
| Cu1-Cl2                                | 2.298(5)   | Cu1-Cl1                                 | 2.2886(17) |
| Cu1-Cl3                                | 2.324(5)   | Cu1-Cl1 <sup>2</sup>                    | 2.2886(17) |
| Cu1-Cl4                                | 2.241(4)   | Cu1- Cl0A <sup>3</sup>                  | 2.287(4)   |
| Cu1-Cl5                                | 2.352(6)   | Cu1-Cl2                                 | 2.311(4)   |
| O1-C5                                  | 1.505(17)  | Cu1-Cl3                                 | 2.325(4)   |
| O1-C8                                  | 1.476(18)  | Cu1-Cl2                                 | 2.275(6)   |
| O1-C5                                  | 1.432(11)  | O1-C2                                   | 1.426(12)  |
| O1-C9                                  | 1.476(12)  | O1-C15                                  | 1.397(8)   |
| N1-C1                                  | 1.439(10)  | O2-C1                                   | 1.42(2)    |
| C1-C2                                  | 1.498(11)  | O2-C16                                  | 1.457(18)  |
| C2-C3                                  | 1.361(10)  | N1-C009                                 | 1.478(19)  |
| C2-C7                                  | 1.363(10)  | C0-C9                                   | 1.67(4)    |
| C3-C4                                  | 1.368(12)  | C009-C10                                | 1.498(12)  |
| C4-C5                                  | 1.366(12)  | C15-C13                                 | 1.3900     |
| C5-C6                                  | 1.398(13)  | C15-C5                                  | 1.3900     |
| C6-C7                                  | 1.362(11)  | C13-C11                                 | 1.3900     |
| Cl1-Cu1-Cl1 <sup>1</sup>               | 173.57(10) | C11-C10                                 | 1.3900     |
| Cl1-Cu1-Cl2                            | 90.02(6)   | C10-C7                                  | 1.3900     |
| Cl1 <sup>1</sup> -Cu1-Cl2              | 90.02(6)   | C7-C5                                   | 1.3900     |
| Cl1-Cu1-Cl3 <sup>2</sup>               | 90.44(5)   | C16-C14                                 | 1.3900     |
| Cl1 <sup>1</sup> -Cu1-Cl3 <sup>2</sup> | 90.44(5)   | Cl1 <sup>1</sup> -Cu1-Cl0A <sup>2</sup> | 89.92(4)   |
| Cl1 <sup>1</sup> -Cu1-Cl3              | 89.90(6)   | Cl1-Cu1- Cl0A <sup>2</sup>              | 89.92(4)   |

---

|                                        |            |                                          |           |
|----------------------------------------|------------|------------------------------------------|-----------|
| Cl1-Cu1-Cl3                            | 89.90(6)   | Cl1 <sup>1</sup> -Cu1-Cl1                | 174.80(8) |
| Cl1 <sup>1</sup> -Cu1-Cl5              | 93.21(5)   | Cl1-Cu1-Cl2                              | 90.43(4)  |
| Cl1-Cu1-Cl5 <sup>3</sup>               | 86.79(5)   | Cl1 <sup>1</sup> -Cu1-Cl2                | 90.43(4)  |
| Cl1-Cu1-Cl5                            | 93.21(5)   | Cl1 <sup>1</sup> -Cu1-Cl3                | 87.41(4)  |
| Cl2-Cu1-Cl3 <sup>2</sup>               | 171.90(14) | Cl1-Cu1-Cl3                              | 87.41(4)  |
| Cl2-Cu1-Cl5 <sup>3</sup>               | 93.6(2)    | Cl1A <sup>3</sup> -Cu1-Cl0A <sup>2</sup> | 89.7(2)   |
| Cl2-Cu1-Cl5                            | 88.30(19)  | Cl1A <sup>3</sup> -Cu1-Cl1 <sup>1</sup>  | 92.60(4)  |
| Cl3 <sup>2</sup> -Cu1-Cl3              | 173.9(3)   | Cl1A <sup>3</sup> -Cu1-Cl1               | 92.60(4)  |
| Cl3 <sup>2</sup> -Cl1-Cl5 <sup>3</sup> | 94.5(2)    | Cl3 <sup>3</sup> -Cu1-Cl2 <sup>2</sup>   | 83.58(12) |
| C8-O1-C5                               | 114(3)     | Cl2-Cu1-Cl3                              | 94.9(2)   |
| C5-O2-C9                               | 110.4(10)  | C15-O1-C2                                | 117.1(11) |
| N1-C1-C2                               | 115.1(6)   | C1-O2-C16                                | 108(3)    |
| C3-C2-C1                               | 119.3(7)   | N2-C0-C9                                 | 121(3)    |
| C3-C2-C7                               | 119.6(8)   | N1-C009-C10                              | 111.7(10) |
| C7-C2-C1                               | 121.1(8)   | C13-C15-O1                               | 116.2(6)  |
| C2-C3-C4                               | 122.0(8)   | C13-C15-C5                               | 120       |
| C5-C4-C3                               | 118.1(10)  | C5-C15-O1                                | 123.8(6)  |
| C4-C5-O1                               | 152.4(17)  | C15-C13-C11                              | 120       |
| C4-C5-O2                               | 108.5(10)  | C11-C10-C009                             | 110.2(7)  |
| C4-C5-C6                               | 120.9(9)   | C7-C10-C009                              | 129.6(7)  |
| C6-C5-O1                               | 86.2(15)   | C7-C10-C11                               | 120       |
| C6-C5-O2                               | 130.5(9)   | C14-C16-O2                               | 126(2)    |
| C7-C6-C5                               | 119.0(9)   | C6-C16-O2                                | 114(2)    |
| C6-C7-C2                               | 120.5(9)   | C12-C9-C0                                | 150(2)    |
|                                        |            | C12-C9-C8                                | 120       |
|                                        |            | C8-C9-C0                                 | 90(2)     |

---



Symmetry codes: <sup>1</sup>+X,3/2-Y,+Z; <sup>2</sup>+X,+Y, 1+Z; <sup>3</sup>-1/2+X,+Y, 1/2-Z; <sup>4</sup>+X,+Y, -1+Z; <sup>5</sup>-1/2+X,+Y, 1/2-Z;

**Table S5** Selected bond lengths /Å and angles/° for compound **2**

| Compound <b>2</b> |            |                           |            |
|-------------------|------------|---------------------------|------------|
| Cu1-Cl1           | 2.281(13)  | Cl1-Cu1-Cl4               | 92.37(13)  |
| Cu1-Cl2           | 2.299(12)  | Cl1-Cu1-Cl0A <sup>1</sup> | 83.21(13)  |
| Cu1-Cl3           | 2.2766(19) | Cl1-Cu1-Cl0A <sup>2</sup> | 177.38(12) |
| Cu1-Cl4           | 2.281(2)   | Cl2-Cu1-Cl1A <sup>2</sup> | 92.99(14)  |
| N1-C1             | 1.454(10)  | Cl4-Cu1-Cl2               | 89.72(13)  |
| C1-C2             | 1.497(8)   | Cl4-Cu1-Cl0A <sup>1</sup> | 90.67(14)  |
| C2-C3             | 1.360(8)   | Cl4-Cu1-Cl1A <sup>1</sup> | 87.91(13)  |
| C3-C4             | 1.381(9)   | C13-C14-C9                | 121.4(6)   |
| C4-C5             | 1.358(10)  | N2-C8-C9                  | 113.6(5)   |
| C5-C6             | 1.368(10)  | C11-C10-C9                | 119.5(6)   |
| C6-C7             | 1.368(9)   | C14-C9-C8                 | 121.6(6)   |
| N2-C8             | 1.448(9)   | C14-C9-C10                | 118.9(5)   |
| C8-C9             | 1.501(8)   | C2-C3-C4                  | 120.3(6)   |
| C9-C10            | 1.386(9)   | C3-C2-C7                  | 119.0(5)   |
| C9-C14            | 1.380(8)   | C3-C2-C1                  | 121.8(6)   |
| C10-C11           | 1.386(9)   | C7-C2-C1                  | 119.2(6)   |
| C11-C12           | 1.354(10)  | C6-C7-C2                  | 119.9(6)   |
| C12-C13           | 1.391(10)  | C14-C13-C12               | 119.3(6)   |

|                   |                           |           |             |          |
|-------------------|---------------------------|-----------|-------------|----------|
|                   | C13-C14                   | 1.363(9)  | C12-C11-C10 | 120.8(6) |
| Sym               | Cl3-Cu1-Cl1               | 92.35(13) | C7-C6-C5    | 120.8(6) |
| metry             | Cl3-Cu1-Cl2               | 89.73(13) | C5-C4-C3    | 120.7(6) |
| codes:            | Cl3-Cu1-Cl4               | 175.24(9) | N1-C1-C2    | 113.6(5) |
| <sup>1</sup> +X,- | Cl3-Cu1-Cl0A <sup>1</sup> | 90.46(14) | C4-C5-C6    | 119.2(6) |
| 1+Y,              | Cl3-Cu1-ClA <sup>2</sup>  | 87.40(13) | C11-C12-C13 | 120.1(6) |

+Z;

<sup>2</sup>+X,-Y,1/2+Z
